# Supplementary material for: Performance Study of Methane Dry Reforming on Ni/ZrO2 Catalyst
Source: MDPI journal article supplement (doi:10.3390/en15103841), 2022-05-23
Supplement: s1 [file s1]

Archive with 1 entries (1 files):
- energies-1705857-supplementary.pdf
